# Supplementary material for: Efficient yellow and red thermally activated delayed fluorescence materials based on a quinoxaline-derived electron-acceptor
Source: Royal Society of Chemistry journal article supplement (doi:10.1039/d2nj01072k), 2022-01-01
Supplement: d2nj01072k1.pdf [file d2nj01072k1.pdf]

## Supporting information

### Efficient Yellow and Red Thermally Activated Delayed Fluorescence Materials Based on a Quinoxaline-Derived Electron-Acceptor

Si-Chao Ji <sup>a,b,c</sup>, Shanshan Jiang <sup>b,c,e</sup>, Tianxiang Zhao <sup>b,c,f</sup>, Lingyi Meng <sup>b,c,e</sup>, Xu-Lin Chen <sup>b,c,d</sup> \* and Can-Zhong Lu <sup>a,b,c,d,f</sup> \*

<sup>a</sup> College of Chemistry, Fuzhou University, Fuzhou, Fujian 350108, P.R. China

<sup>b</sup> CAS Key Laboratory of Design and Assembly of Functional Nanostructures, and Fujian Provincial Key Laboratory of Nanomaterials, Fujian Institute of Research on the Structure of Matter, Chinese Academy of Sciences, Fuzhou, Fujian 350002, P.R. China

<sup>c</sup> Xiamen Key Laboratory of Rare Earth Photoelectric Functional Materials, Xiamen Institute of Rare-earth Materials, Haixi Institutes, Chinese Academy of Sciences, Xiamen, Fujian 361021, P.R. China

<sup>d</sup> Fujian Science & Technology Innovation Laboratory for Optoelectronic Information of China, Fuzhou, Fujian 350108, P. R. China

<sup>e</sup> Jiangxi Provincial Key Laboratory of Functional Molecular Materials Chemistry, Department of Materials, Metallurgy and Chemistry, Jiangxi University of Science and Technology, Ganzhou 341000, P. R. China

<sup>f</sup> University of Chinese Academy of Sciences, P.R. China

\* Corresponding authors.

Can-Zhong Lu, E-mail: czlu@fjirsm.ac.cn

Xu-Lin Chen, E-mail: xlchem@fjirsm.ac.cn

## **Table of Contents**

1. Synthesis of Materials
2. NMR Spectra
3. X-ray Crystallographic Analysis
4. Thermal and Electrochemical Properties
5. Photophysical Properties
6. Theoretical Calculations
7. Electroluminescent properties
8. Reference

## 1. Synthesis of Materials

### 1, 2-bis (4-(9, 9-dimethylacridin-10(9H)-yl) phenyl) ethane-1, 2-dione (DDMAC-BZ)

To a solution of 4, 4'-Dibromobenzil (1.1 g, 3 mmol), 9,9-dimethyl-9,10-dihydroacridine (1.38 g, 6.6 mmol), cesium carbonate (3.91 g, 12.00 mmol), and tri-tert-butylphosphonium tetrafluoroborate (131 mg, 0.45 mmol) in dry toluene (60 mL), palladium (II) acetate (34 mg, 0.15 mmol) was added, and then the mixture was refluxed at 110°C for 12h under a nitrogen atmosphere. After cooling, the mixture was extracted with brine and CH<sub>2</sub>Cl<sub>2</sub>. The collected organic phase was dried over anhydrous Na<sub>2</sub>SO<sub>4</sub> and concentrated by rotary evaporation. The crude product was purified by column chromatography on silica gel to give an orange powder (1.2 g, 64%). <sup>1</sup>H NMR (500 MHz, CDCl<sub>3</sub>) δ 8.28 (d, *J* = 8.6 Hz, 4H), 7.57 (d, *J* = 8.5 Hz, 4H), 7.52 (d, *J* = 1.9 Hz, 2H), 7.50 (d, *J* = 1.9 Hz, 2H), 7.06 (ddd, *J* = 9.3, 7.5, 1.7 Hz, 8H), 6.53 (d, *J* = 1.6 Hz, 2H), 6.51 (d, *J* = 1.6 Hz, 2H), 1.69 (s, 12H).

### 1, 2-bis (4-(10H-phenoxazin-10-yl) phenyl) ethane-1, 2-dione (DPXZ-BZ)

The synthesis process was referred to the reported literature.<sup>1</sup>

### 10, 10'-((6, 7-dibromoquinoxaline-2, 3-diyl) bis (4, 1-phenylene)) bis (9, 9-dimethyl-9, 10-dihydroacridine) (BrQP-DDMAC)

DDMAC-BZ (937.2 mg, 1.5 mmol) and 4, 5-Dibromobenzene-1, 2-diamine (398.9 mg, 1.5 mmol) were added into a two-necked round-bottomed flask containing 25 mL dry 1-Butanol. The mixture was refluxed at 120°C for 12h under a nitrogen atmosphere. When the reaction completed, the reaction mixture was extracted with brine and CH<sub>2</sub>Cl<sub>2</sub>, and dried over anhydrous Na<sub>2</sub>SO<sub>4</sub>, and concentrated in vacuum. The crude product was purified by column chromatography on silica gel to give the product as a yellowish green solid (0.94 g, 73%). <sup>1</sup>H NMR (500 MHz, CDCl<sub>3</sub>) δ 8.62 (s, 1H), 8.20 (d, *J* = 8.4 Hz, 1H), 7.86 (d, *J* = 8.4 Hz, 3H), 7.57 (d, *J* = 8.4 Hz, 1H), 7.52 (dd, *J* = 7.6, 1.7 Hz, 1H), 7.48 (dd, *J* = 7.6, 1.7 Hz, 3H), 7.44 (d, *J* = 8.4 Hz, 3H), 7.03 (ddd, *J* = 14.7, 7.7, 1.5 Hz, 2H), 6.95 – 6.84 (m, 7H), 6.40 (dd, *J* = 8.0, 1.4 Hz, 1H), 6.35 (dd, *J* = 8.1, 1.4 Hz, 3H), 1.72 (d, *J* = 11.3 Hz, 12H).

### 10, 10'-((6, 7-dibromoquinoxaline-2, 3-diyl) bis (4, 1-phenylene)) bis (10H-

**phenoxazine) (BrQP-DPXZ)**

It was prepared by the same procedure with BrQP-DDMAC excepting using the DPXZ-BZ (860 mg, 1.5 mmol). And get DPXZ-BZ is an orange solid (0.84 g, 70 %).

<sup>1</sup>H NMR (500 MHz, CDCl<sub>3</sub>) δ 8.57 (s, 2H), 7.77 (d, *J* = 8.4 Hz, 4H), 7.40 (d, *J* = 8.5 Hz, 4H), 6.70 (dd, *J* = 7.9, 1.5 Hz, 4H), 6.64 (td, *J* = 7.6, 1.4 Hz, 4H), 6.54 (d, *J* = 1.5 Hz, 1H), 6.52 (d, *J* = 1.5 Hz, 2H), 6.51 (d, *J* = 1.5 Hz, 1H), 5.95 (dd, *J* = 7.9, 1.5 Hz, 4H).

**4, 4'-(2, 3-bis (4-(9, 9-dimethylacridin-10(9H)-yl) phenyl) quinoxaline-6, 7-diyl) dibenzonitrile (DMAC-QCN)**

A two-necked round-bottomed flask was charged with BrQP-DDMAC (854.7 mg, 1 mmol), 4-Cyanophenylboronic acid (441 mg, 3 mmol), Pd(PPh<sub>3</sub>)<sub>4</sub> (57.8 mg, 0.05 mmol), K<sub>2</sub>CO<sub>3</sub> (414.6 mg, 3 mmol) and THF/H<sub>2</sub>O solution (15 ml/3 ml). The flask was then evacuated and purged with nitrogen gas for three times and the mixture was refluxed at 70°C for 12h under a nitrogen atmosphere. After cooled to room temperature, the solution was extracted several times with ethyl acetate and brine, and dried over anhydrous Na<sub>2</sub>SO<sub>4</sub>, and concentrated in vacuum. Then the crude product was purified via column chromatography on silica gel to give the product as a yellowish green solid (0.61 g, 68%). <sup>1</sup>H NMR (500 MHz, CDCl<sub>3</sub>) δ 8.37 (s, 2H), 7.89 (d, *J* = 8.3 Hz, 4H), 7.66 (d, *J* = 8.3 Hz, 4H), 7.48 – 7.38 (m, 12H), 6.93 – 6.83 (m, 8H), 6.34 (dd, *J* = 8.1, 1.4 Hz, 4H), 1.69 (s, 12H). <sup>13</sup>C NMR (126 MHz, CDCl<sub>3</sub>) δ 154.37, 144.15, 142.60, 141.21, 140.86, 140.61, 138.26, 132.44, 132.34, 131.50, 131.24, 130.52, 130.37, 126.52, 125.19, 120.93, 118.35, 114.02, 111.91, 36.05, 30.91. Anal. calcd. for C<sub>64</sub>H<sub>46</sub>N<sub>6</sub>: C, 85.50; H, 5.16; N, 9.35. Found: C, 85.42; H, 5.12; N, 9.33.

**4, 4'-(2, 3-bis (4-(10H-phenoxazin-10-yl) phenyl) quinoxaline-6, 7-diyl) dibenzonitrile (PXZ-QCN)**

It was prepared by the same procedure with DMAC-QCN excepting using the BrQP-DPXZ (802.5 mg, 1 mmol). And get PXZ-QCN is an orange solid (0.65 g, 77 %). <sup>1</sup>H NMR (500 MHz, CDCl<sub>3</sub>) δ 8.34 (s, 2H), 7.82 (d, *J* = 8.4 Hz, 4H), 7.65 (d, *J* = 8.4 Hz, 4H), 7.43 (d, *J* = 8.4 Hz, 4H), 7.38 (d, *J* = 8.4 Hz, 4H), 6.70 (dd, *J* = 7.9, 1.5 Hz, 4H),

6.64 (td,  $J = 7.6, 1.4$  Hz, 4H), 6.53 (td,  $J = 7.7, 1.5$  Hz, 4H), 5.96 (dd,  $J = 8.0, 1.4$  Hz, 4H).  $^{13}\text{C}$  NMR (126 MHz,  $\text{CDCl}_3$ )  $\delta$  153.98, 144.04, 143.97, 141.40, 140.72, 140.43, 138.35, 133.83, 132.61, 132.35, 131.13, 131.05, 130.50, 123.41, 121.75, 118.31, 115.69, 113.15, 111.97. Anal. calcd. For  $\text{C}_{58}\text{H}_{34}\text{N}_6\text{O}_2$ : C, 82.25; H, 4.05; N, 9.92. Found: C, 82.29; H, 4.07; N, 9.97.

## 2. NMR Spectra

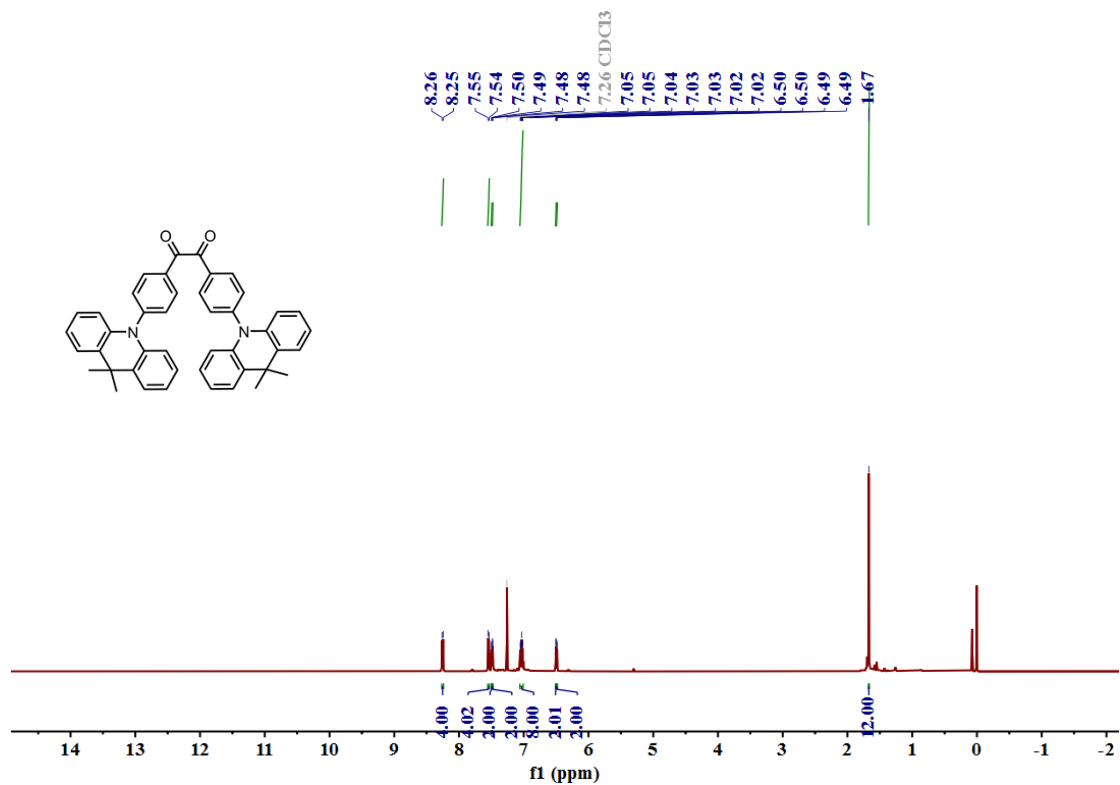

**Figure S1.**  $^1\text{H}$ -NMR spectrum of DDMAC-BZ (500 MHz,  $\text{CDCl}_3$ ).

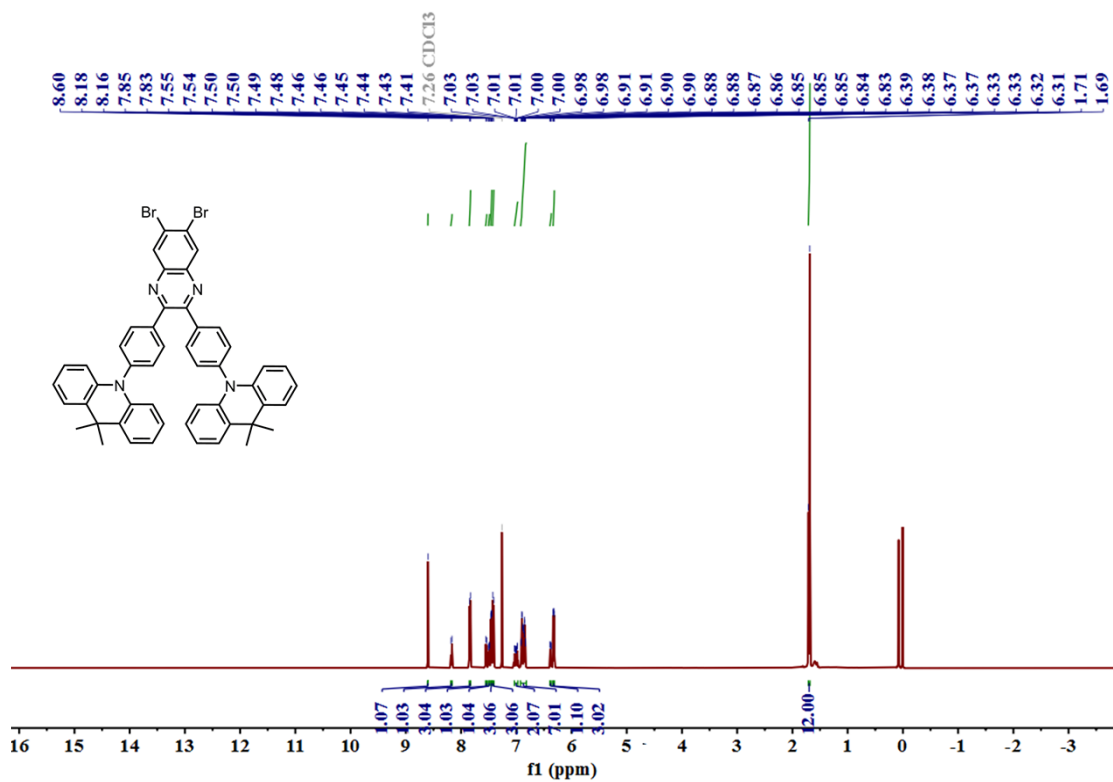

**Figure S2.** <sup>1</sup>H-NMR spectrum of BrQP-DDMAC (500 MHz, CDCl<sub>3</sub>).

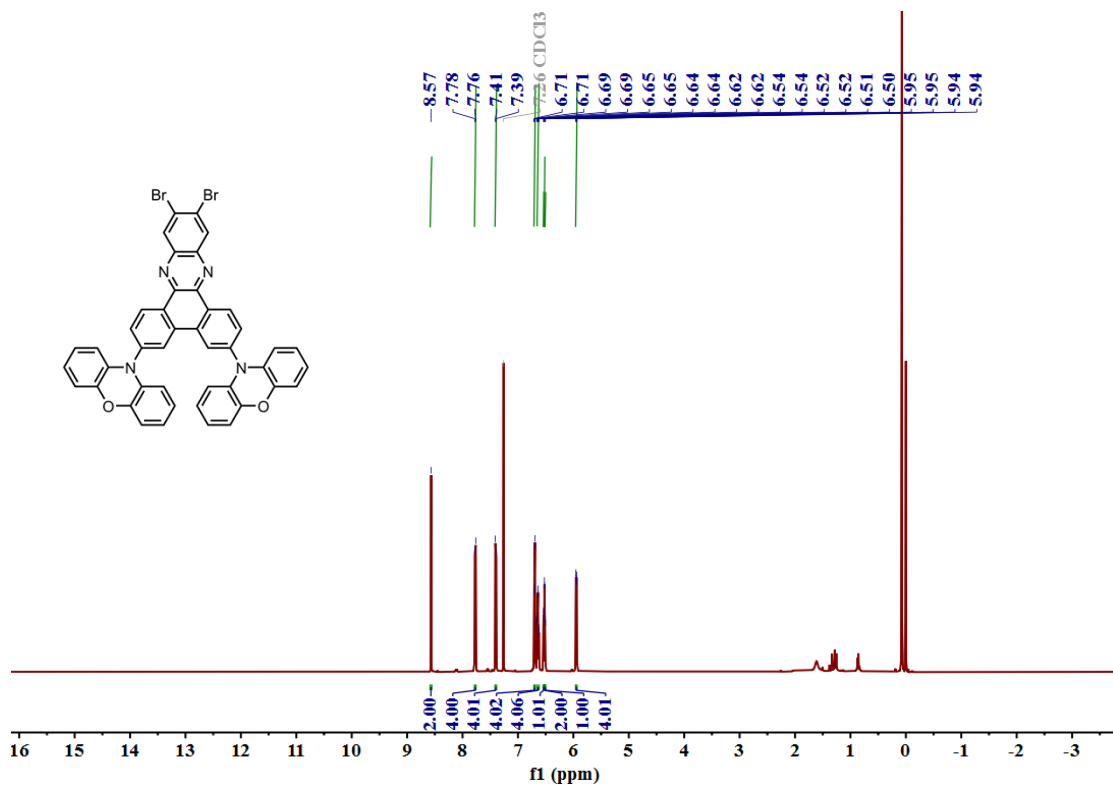

**Figure S3.** <sup>1</sup>H-NMR spectrum of BrQP-DPXZ (500 MHz, CDCl<sub>3</sub>).

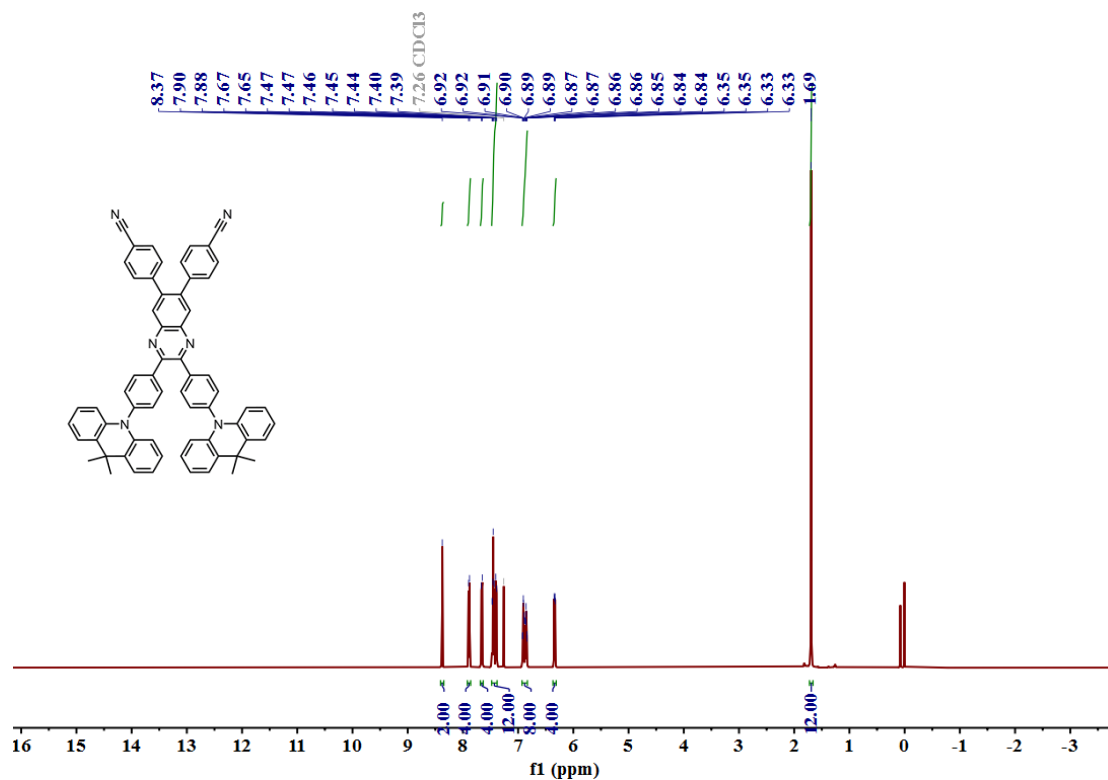

Figure S4. <sup>1</sup>H-NMR spectrum of DMAC-QCN (500 MHz, CDCl<sub>3</sub>).

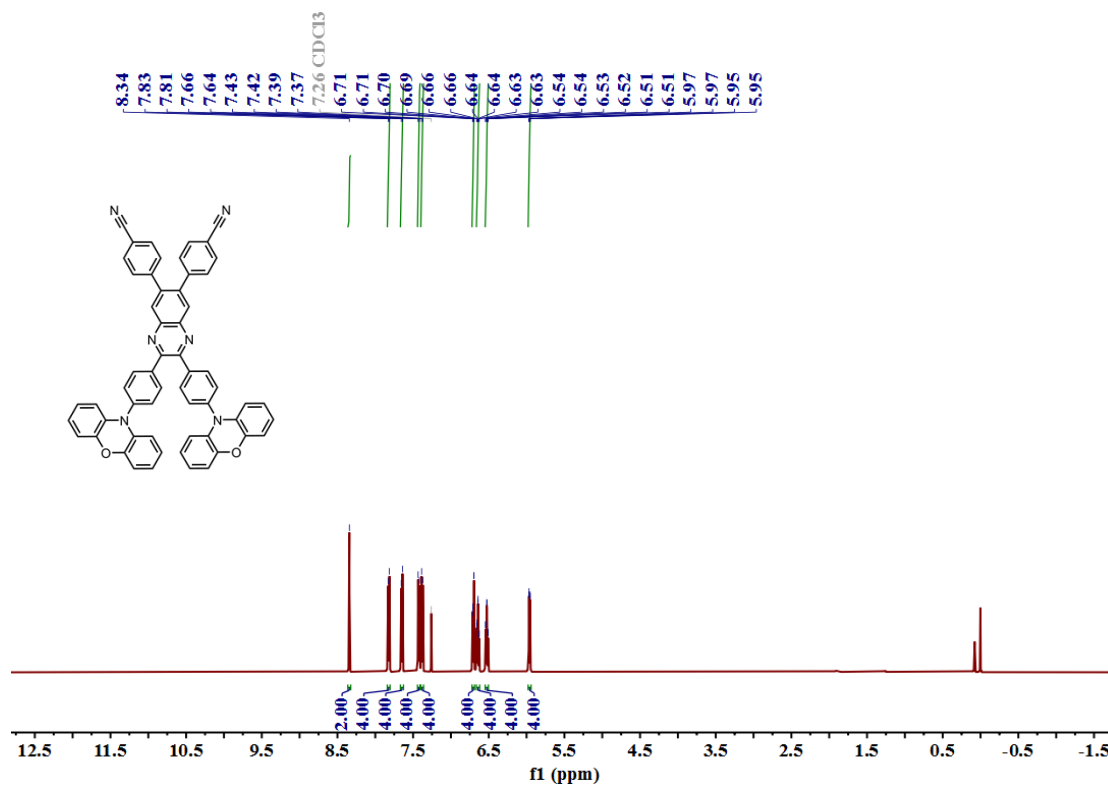

Figure S5. <sup>1</sup>H-NMR spectrum of PXZ-QCN (500 MHz, CDCl<sub>3</sub>).

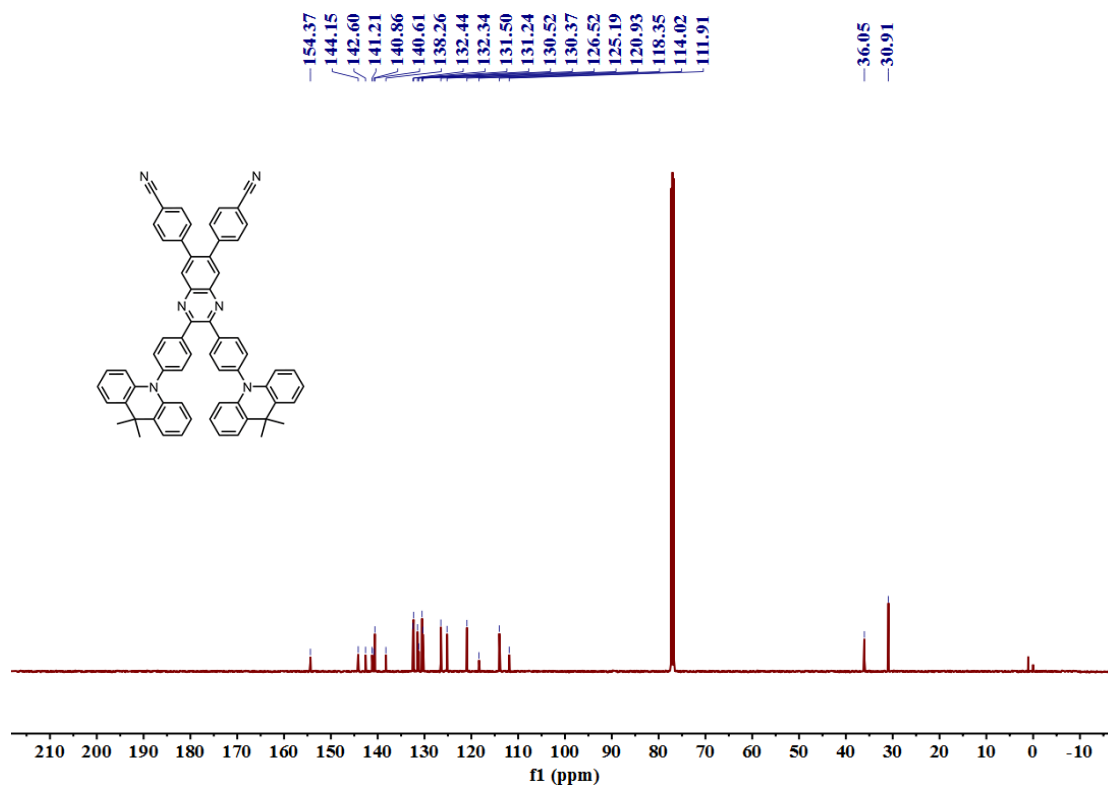

**Figure S6.** <sup>13</sup>C-NMR spectrum of DMAC-QCN (500 MHz, CDCl<sub>3</sub>).

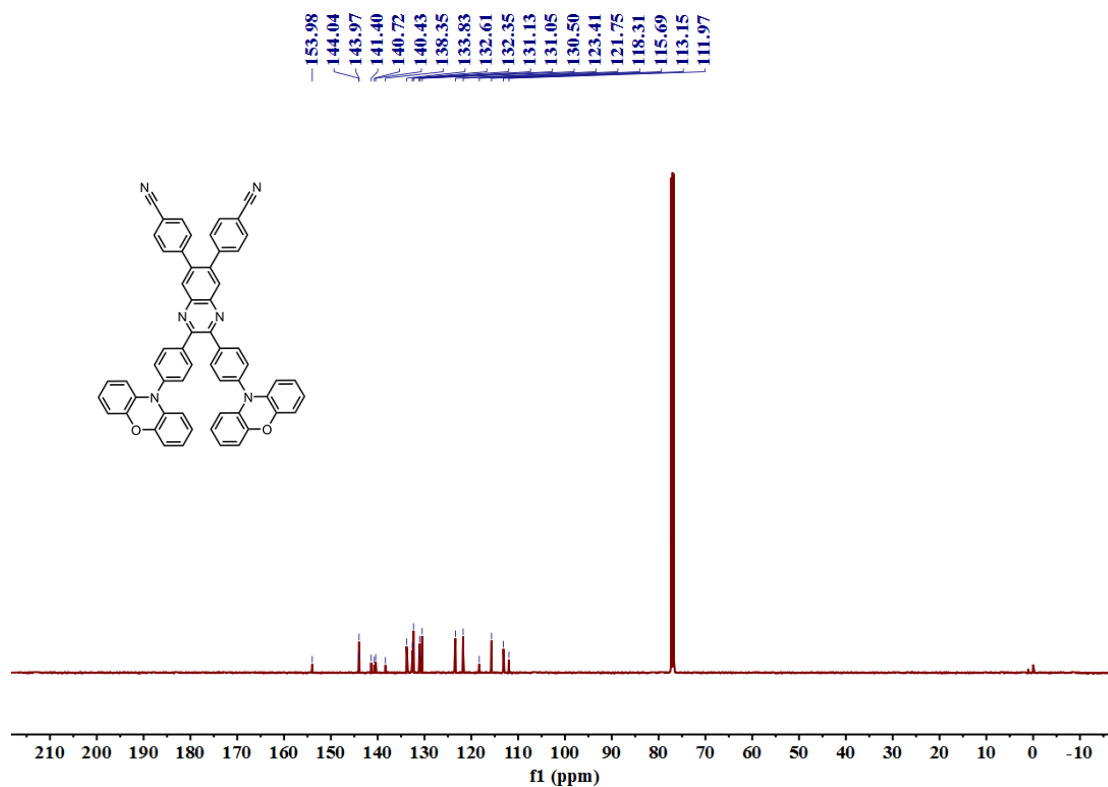

**Figure S7.** <sup>13</sup>C-NMR spectrum of PXZ-QCN (500 MHz, CDCl<sub>3</sub>).

### 3. X-ray Crystallographic Analysis

**Table S1.** Crystal data and structure refinements for DMAC-QCN and PXZ-QCN.



| Compounds                          | DMAC-QCN                                                       | PXZ-QCN                                                       |
|------------------------------------|----------------------------------------------------------------|---------------------------------------------------------------|
| Empirical formula                  | C <sub>64</sub> H <sub>46</sub> N <sub>6</sub>                 | C <sub>58</sub> H <sub>34</sub> N <sub>6</sub> O <sub>2</sub> |
| Formula weight                     | 899.07                                                         | 846.91                                                        |
| Temperature/K                      | 200.00                                                         | 200.00                                                        |
| Crystal system                     | triclinic                                                      | triclinic                                                     |
| Space group                        | P-1                                                            | P-1                                                           |
| a/Å                                | 10.5869(4)                                                     | 11.0106(5)                                                    |
| b/Å                                | 14.2196(6)                                                     | 15.1674(8)                                                    |
| c/Å                                | 16.8639(7)                                                     | 15.2817(9)                                                    |
| α/°                                | 87.049(2)                                                      | 77.222(2)                                                     |
| β/°                                | 82.503(2)                                                      | 73.086(2)                                                     |
| γ/°                                | 74.066(2)                                                      | 74.851(2)                                                     |
| Volume/Å <sup>3</sup>              | 2419.98(17)                                                    | 2327.5(2)                                                     |
| Z                                  | 2                                                              | 2                                                             |
| ρ <sub>calc</sub> /cm <sup>3</sup> | 1.234                                                          | 1.208                                                         |
| μ/mm <sup>-1</sup>                 | 0.073                                                          | 0.075                                                         |
| F(000)                             | 944.0                                                          | 880.0                                                         |
| Crystal size/mm <sup>3</sup>       | 0.15 × 0.1 × 0.06                                              | 0.16 × 0.04 × 0.03                                            |
| Radiation                          | MoKα (λ = 0.71073)                                             | MoKα (λ = 0.71073)                                            |
| 2θ range for data collection/°     | 3.818 to 55.034                                                | 5.32 to 49.994                                                |
| Index ranges                       | -13 ≤ h ≤ 13, -18 ≤ k ≤ 18, -21 ≤ l ≤ 21                       | -13 ≤ h ≤ 13, -18 ≤ k ≤ 18                                    |
| Reflections collected              | 107112                                                         | 90423                                                         |
| Independent reflections            | 11104 [R <sub>int</sub> = 0.1571, R <sub>sigma</sub> = 0.0773] | 8170 [R <sub>int</sub> = 0.1268, R <sub>sigma</sub> = 0.0538] |
| Data/restraints/parameters         | 11104/0/635                                                    | 8170/0/571                                                    |
| Goodness-of-fit on F <sup>2</sup>  | 1.016                                                          | 1.119                                                         |
| Final R indexes [I ≥ 2σ (I)]       | R <sub>1</sub> = 0.0614, wR <sub>2</sub> =                     | R <sub>1</sub> = 0.0654, wR <sub>2</sub> =                    |

|                                             |                        |                        |
|---------------------------------------------|------------------------|------------------------|
|                                             | 0.1260                 | 0.1668                 |
| Final R indexes [all data]                  | $R_1 = 0.1423, wR_2 =$ | $R_1 = 0.1177, wR_2 =$ |
|                                             | 0.1627                 | 0.1862                 |
| Largest diff. peak/hole / e Å <sup>-3</sup> | 0.20/-0.26             | 0.80/-0.44             |

**Table S2.** Bond Lengths for DMAC-QCN.

| Atom | Atom | Length/Å | Atom | Atom | Length/Å |
|------|------|----------|------|------|----------|
| N1   | C4   | 1.412(3) | C22  | C23  | 1.381(4) |
| N1   | C5   | 1.442(3) | C23  | C24  | 1.489(3) |
| N1   | C51  | 1.412(3) | C23  | C63  | 1.389(3) |
| N2   | C14  | 1.438(3) | C24  | C25  | 1.436(3) |
| N2   | C15  | 1.421(3) | C24  | C42  | 1.371(3) |
| N2   | C33  | 1.411(3) | C25  | C26  | 1.367(3) |
| N3   | C19  | 1.146(3) | C25  | C56  | 1.495(3) |
| N4   | C10  | 1.320(3) | C26  | C27  | 1.410(3) |
| N4   | C27  | 1.370(3) | C27  | C41  | 1.402(3) |
| N5   | C9   | 1.322(3) | C28  | C29  | 1.399(4) |
| N5   | C41  | 1.363(3) | C29  | C30  | 1.520(4) |
| N6   | C60  | 1.146(3) | C30  | C31  | 1.553(4) |
| C1   | C2   | 1.547(4) | C30  | C32  | 1.515(4) |
| C2   | C3   | 1.525(3) | C30  | C38  | 1.533(3) |
| C2   | C49  | 1.541(3) | C32  | C33  | 1.404(3) |
| C2   | C50  | 1.527(3) | C32  | C37  | 1.389(4) |
| C3   | C4   | 1.396(3) | C33  | C34  | 1.395(4) |
| C3   | C45  | 1.390(3) | C34  | C35  | 1.385(4) |
| C4   | C48  | 1.397(3) | C35  | C36  | 1.385(4) |
| C5   | C6   | 1.387(3) | C36  | C37  | 1.380(4) |
| C5   | C43  | 1.377(3) | C39  | C40  | 1.385(3) |
| C6   | C7   | 1.381(3) | C41  | C42  | 1.409(3) |

|     |     |          |     |     |          |
|-----|-----|----------|-----|-----|----------|
| C7  | C8  | 1.399(3) | C43 | C44 | 1.386(3) |
| C8  | C9  | 1.490(3) | C45 | C46 | 1.381(4) |
| C8  | C44 | 1.398(3) | C46 | C47 | 1.375(4) |
| C9  | C10 | 1.438(3) | C47 | C48 | 1.381(3) |
| C10 | C11 | 1.491(3) | C50 | C51 | 1.401(3) |
| C11 | C12 | 1.390(3) | C50 | C55 | 1.393(3) |
| C11 | C40 | 1.390(3) | C51 | C52 | 1.387(3) |
| C12 | C13 | 1.385(3) | C52 | C53 | 1.376(3) |
| C13 | C14 | 1.388(3) | C53 | C54 | 1.375(4) |
| C14 | C39 | 1.384(3) | C54 | C55 | 1.380(4) |
| C15 | C16 | 1.392(3) | C56 | C57 | 1.389(3) |
| C15 | C29 | 1.397(3) | C56 | C62 | 1.392(3) |
| C16 | C17 | 1.383(3) | C57 | C58 | 1.383(3) |
| C17 | C18 | 1.378(4) | C58 | C59 | 1.385(4) |
| C18 | C28 | 1.377(4) | C59 | C60 | 1.442(4) |
| C19 | C20 | 1.442(4) | C59 | C61 | 1.381(4) |
| C20 | C21 | 1.384(4) | C61 | C62 | 1.383(3) |
| C20 | C64 | 1.379(4) | C63 | C64 | 1.380(3) |
| C21 | C22 | 1.389(4) |     |     |          |

**Table S3.** Bond Angles for DMAC-QCN.

| Atom | Atom | Atom | Angle/°    | Atom | Atom | Atom | Angle/°    |
|------|------|------|------------|------|------|------|------------|
| C4   | N1   | C5   | 117.60(17) | C26  | C25  | C24  | 119.6(2)   |
| C51  | N1   | C4   | 120.33(18) | C26  | C25  | C56  | 120.3(2)   |
| C51  | N1   | C5   | 120.89(18) | C25  | C26  | C27  | 121.1(2)   |
| C15  | N2   | C14  | 119.25(19) | N4   | C27  | C26  | 119.4(2)   |
| C33  | N2   | C14  | 117.29(19) | N4   | C27  | C41  | 121.04(19) |
| C33  | N2   | C15  | 118.60(19) | C41  | C27  | C26  | 119.50(19) |
| C10  | N4   | C27  | 117.23(18) | C18  | C28  | C29  | 122.4(3)   |
| C9   | N5   | C41  | 117.69(18) | C15  | C29  | C28  | 117.7(3)   |

---

|     |     |     |            |     |     |     |            |
|-----|-----|-----|------------|-----|-----|-----|------------|
| C3  | C2  | C1  | 107.7(2)   | C15 | C29 | C30 | 118.3(2)   |
| C3  | C2  | C49 | 110.9(2)   | C28 | C29 | C30 | 123.8(2)   |
| C3  | C2  | C50 | 109.65(19) | C29 | C30 | C31 | 107.7(2)   |
| C49 | C2  | C1  | 108.7(2)   | C29 | C30 | C38 | 112.3(2)   |
| C50 | C2  | C1  | 108.5(2)   | C32 | C30 | C29 | 107.5(2)   |
| C50 | C2  | C49 | 111.3(2)   | C32 | C30 | C31 | 108.6(2)   |
| C4  | C3  | C2  | 120.9(2)   | C32 | C30 | C38 | 112.8(3)   |
| C45 | C3  | C2  | 121.1(2)   | C38 | C30 | C31 | 107.8(2)   |
| C45 | C3  | C4  | 117.6(2)   | C33 | C32 | C30 | 118.6(2)   |
| C3  | C4  | N1  | 119.53(19) | C37 | C32 | C30 | 123.7(3)   |
| C3  | C4  | C48 | 120.3(2)   | C37 | C32 | C33 | 117.5(3)   |
| C48 | C4  | N1  | 120.1(2)   | C32 | C33 | N2  | 118.5(2)   |
| C6  | C5  | N1  | 118.6(2)   | C34 | C33 | N2  | 121.1(2)   |
| C43 | C5  | N1  | 121.3(2)   | C34 | C33 | C32 | 120.4(2)   |
| C43 | C5  | C6  | 119.8(2)   | C35 | C34 | C33 | 120.6(3)   |
| C7  | C6  | C5  | 119.9(2)   | C34 | C35 | C36 | 119.2(3)   |
| C6  | C7  | C8  | 121.0(2)   | C37 | C36 | C35 | 120.0(3)   |
| C7  | C8  | C9  | 118.11(19) | C36 | C37 | C32 | 122.1(3)   |
| C44 | C8  | C7  | 118.2(2)   | C14 | C39 | C40 | 120.2(2)   |
| C44 | C8  | C9  | 123.4(2)   | C39 | C40 | C11 | 120.5(2)   |
| N5  | C9  | C8  | 113.93(19) | N5  | C41 | C27 | 121.20(19) |
| N5  | C9  | C10 | 121.07(19) | N5  | C41 | C42 | 119.6(2)   |
| C10 | C9  | C8  | 124.98(18) | C27 | C41 | C42 | 119.1(2)   |
| N4  | C10 | C9  | 121.77(19) | C24 | C42 | C41 | 121.4(2)   |
| N4  | C10 | C11 | 115.23(19) | C5  | C43 | C44 | 120.7(2)   |
| C9  | C10 | C11 | 122.99(18) | C43 | C44 | C8  | 120.3(2)   |
| C12 | C11 | C10 | 120.26(19) | C46 | C45 | C3  | 122.2(2)   |
| C40 | C11 | C10 | 120.8(2)   | C47 | C46 | C45 | 119.6(2)   |
| C40 | C11 | C12 | 119.0(2)   | C46 | C47 | C48 | 119.9(2)   |

---

|     |     |     |            |     |     |     |          |
|-----|-----|-----|------------|-----|-----|-----|----------|
| C13 | C12 | C11 | 120.7(2)   | C47 | C48 | C4  | 120.3(2) |
| C12 | C13 | C14 | 119.8(2)   | C51 | C50 | C2  | 120.9(2) |
| C13 | C14 | N2  | 118.8(2)   | C55 | C50 | C2  | 121.7(2) |
| C39 | C14 | N2  | 121.31(19) | C55 | C50 | C51 | 117.2(2) |
| C39 | C14 | C13 | 119.9(2)   | C50 | C51 | N1  | 119.2(2) |
| C16 | C15 | N2  | 121.8(2)   | C52 | C51 | N1  | 120.2(2) |
| C16 | C15 | C29 | 119.7(2)   | C52 | C51 | C50 | 120.6(2) |
| C29 | C15 | N2  | 118.5(2)   | C53 | C52 | C51 | 120.7(2) |
| C17 | C16 | C15 | 120.8(2)   | C54 | C53 | C52 | 119.5(2) |
| C18 | C17 | C16 | 120.0(3)   | C53 | C54 | C55 | 120.1(2) |
| C28 | C18 | C17 | 119.0(3)   | C54 | C55 | C50 | 121.9(2) |
| N3  | C19 | C20 | 176.2(3)   | C57 | C56 | C25 | 118.9(2) |
| C21 | C20 | C19 | 120.5(3)   | C57 | C56 | C62 | 118.7(2) |
| C64 | C20 | C19 | 118.6(3)   | C62 | C56 | C25 | 122.3(2) |
| C64 | C20 | C21 | 120.8(2)   | C58 | C57 | C56 | 120.9(2) |
| C20 | C21 | C22 | 119.2(3)   | C57 | C58 | C59 | 119.5(3) |
| C23 | C22 | C21 | 120.6(3)   | C58 | C59 | C60 | 118.5(3) |
| C22 | C23 | C24 | 120.6(2)   | C61 | C59 | C58 | 120.4(2) |
| C22 | C23 | C63 | 119.1(2)   | C61 | C59 | C60 | 121.1(3) |
| C63 | C23 | C24 | 120.3(2)   | N6  | C60 | C59 | 178.2(4) |
| C25 | C24 | C23 | 120.4(2)   | C59 | C61 | C62 | 119.7(2) |
| C42 | C24 | C23 | 120.2(2)   | C61 | C62 | C56 | 120.7(2) |
| C42 | C24 | C25 | 119.3(2)   | C64 | C63 | C23 | 120.9(3) |
| C24 | C25 | C56 | 119.96(19) | C20 | C64 | C63 | 119.3(3) |

**Table S4.** Bond Lengths for PXZ-QCN.

| Atom | Atom | Length/Å | Atom | Atom | Length/Å |
|------|------|----------|------|------|----------|
| O1   | C18  | 1.390(3) | C19  | C57  | 1.364(4) |
| O1   | C19  | 1.387(3) | C20  | C54  | 1.378(4) |
| O2   | C31  | 1.392(4) | C21  | C22  | 1.393(4) |

---

|     |     |          |     |     |          |
|-----|-----|----------|-----|-----|----------|
| O2  | C32 | 1.379(3) | C21 | C39 | 1.388(4) |
| N1  | C1  | 1.148(4) | C22 | C23 | 1.384(4) |
| C2  | C4  | 1.330(4) | C23 | C24 | 1.382(4) |
| C2  | C5  | 1.560(4) | C24 | N25 | 1.440(3) |
| C2  | C44 | 1.368(4) | C24 | C38 | 1.379(4) |
| N3  | C7  | 1.377(3) | N25 | C26 | 1.404(4) |
| N3  | C8  | 1.315(3) | N25 | C37 | 1.401(3) |
| N4  | C13 | 1.434(3) | C26 | C27 | 1.388(4) |
| N4  | C14 | 1.405(3) | C26 | C31 | 1.401(4) |
| N4  | C20 | 1.391(3) | C27 | C28 | 1.391(4) |
| N5  | C49 | 1.147(3) | C28 | C29 | 1.390(5) |
| N6  | C9  | 1.324(3) | C29 | C30 | 1.380(5) |
| N6  | C40 | 1.362(3) | C30 | C31 | 1.366(4) |
| C1  | C25 | 1.437(4) | C32 | C33 | 1.372(4) |
| C25 | C3  | 1.399(4) | C32 | C37 | 1.392(4) |
| C25 | C43 | 1.380(4) | C33 | C34 | 1.381(4) |
| C3  | C4  | 1.386(4) | C34 | C35 | 1.372(4) |
| C5  | C6  | 1.371(3) | C35 | C36 | 1.388(4) |
| C5  | C42 | 1.444(3) | C36 | C37 | 1.390(4) |
| C6  | C7  | 1.408(4) | C38 | C39 | 1.377(4) |
| C7  | C40 | 1.399(3) | C40 | C41 | 1.410(3) |
| C8  | C9  | 1.438(3) | C41 | C42 | 1.373(4) |
| C8  | C21 | 1.484(3) | C42 | C45 | 1.513(3) |
| C9  | C10 | 1.490(4) | C43 | C44 | 1.379(4) |
| C10 | C11 | 1.399(4) | C45 | C46 | 1.383(4) |
| C10 | C52 | 1.399(3) | C45 | C51 | 1.373(4) |
| C11 | C12 | 1.381(4) | C46 | C47 | 1.383(4) |
| C12 | C13 | 1.377(4) | C47 | C48 | 1.385(4) |
| C13 | C53 | 1.384(4) | C48 | C49 | 1.450(4) |

---

|     |     |          |     |     |          |
|-----|-----|----------|-----|-----|----------|
| C14 | C15 | 1.377(4) | C48 | C50 | 1.386(4) |
| C14 | C18 | 1.386(4) | C50 | C51 | 1.379(4) |
| C15 | C16 | 1.384(4) | C52 | C53 | 1.381(4) |
| C16 | C17 | 1.387(5) | C54 | C55 | 1.376(5) |
| C17 | C58 | 1.376(5) | C55 | C56 | 1.377(5) |
| C18 | C58 | 1.366(4) | C56 | C57 | 1.378(5) |
| C19 | C20 | 1.392(4) |     |     |          |

**Table S5.** Bond Angles for PXZ-QCN.

| Atom | Atom | Atom | Angle/°  | Atom | Atom | Atom | Angle/°  |
|------|------|------|----------|------|------|------|----------|
| C19  | O1   | C18  | 117.8(2) | C24  | C23  | C22  | 120.1(3) |
| C32  | O2   | C31  | 117.6(2) | C23  | C24  | N25  | 119.0(3) |
| C4   | C2   | C5   | 118.5(2) | C38  | C24  | C23  | 119.8(3) |
| C4   | C2   | C44  | 123.2(3) | C38  | C24  | N25  | 121.1(3) |
| C44  | C2   | C5   | 118.1(3) | C26  | N25  | C24  | 121.3(2) |
| C8   | N3   | C7   | 117.2(2) | C37  | N25  | C24  | 119.3(2) |
| C14  | N4   | C13  | 119.8(2) | C37  | N25  | C26  | 119.0(2) |
| C20  | N4   | C13  | 120.3(2) | C27  | C26  | N25  | 124.1(3) |
| C20  | N4   | C14  | 118.8(2) | C27  | C26  | C31  | 117.4(3) |
| C9   | N6   | C40  | 117.1(2) | C31  | C26  | N25  | 118.5(3) |
| N1   | C1   | C25  | 178.6(4) | C26  | C27  | C28  | 121.4(3) |
| C3   | C25  | C1   | 120.6(3) | C27  | C28  | C29  | 119.4(3) |
| C43  | C25  | C1   | 119.9(3) | C30  | C29  | C28  | 120.0(3) |
| C43  | C25  | C3   | 119.5(3) | C31  | C30  | C29  | 120.0(3) |
| C4   | C3   | C25  | 118.9(3) | O2   | C31  | C26  | 121.6(3) |
| C2   | C4   | C3   | 119.8(3) | C30  | C31  | O2   | 116.5(3) |
| C6   | C5   | C2   | 119.3(2) | C30  | C31  | C26  | 121.9(3) |
| C6   | C5   | C42  | 118.6(2) | O2   | C32  | C37  | 121.5(3) |
| C42  | C5   | C2   | 122.1(2) | C33  | C32  | O2   | 117.9(3) |
| C5   | C6   | C7   | 122.1(2) | C33  | C32  | C37  | 120.6(3) |

---

|     |     |     |          |     |     |     |          |
|-----|-----|-----|----------|-----|-----|-----|----------|
| N3  | C7  | C6  | 120.0(2) | C32 | C33 | C34 | 120.9(3) |
| N3  | C7  | C40 | 120.7(2) | C35 | C34 | C33 | 119.2(3) |
| C40 | C7  | C6  | 119.2(2) | C34 | C35 | C36 | 120.3(3) |
| N3  | C8  | C9  | 121.8(2) | C37 | C36 | C35 | 120.7(3) |
| N3  | C8  | C21 | 116.2(2) | C32 | C37 | N25 | 119.4(3) |
| C9  | C8  | C21 | 121.9(2) | C36 | C37 | N25 | 122.3(2) |
| N6  | C9  | C8  | 121.3(2) | C36 | C37 | C32 | 118.2(3) |
| N6  | C9  | C10 | 115.9(2) | C39 | C38 | C24 | 120.0(3) |
| C8  | C9  | C10 | 122.6(2) | C38 | C39 | C21 | 121.0(3) |
| C11 | C10 | C9  | 118.3(2) | N6  | C40 | C7  | 121.7(2) |
| C52 | C10 | C9  | 123.8(2) | N6  | C40 | C41 | 119.0(2) |
| C52 | C10 | C11 | 117.9(3) | C7  | C40 | C41 | 119.2(2) |
| C12 | C11 | C10 | 121.1(3) | C42 | C41 | C40 | 121.4(2) |
| C13 | C12 | C11 | 120.0(3) | C5  | C42 | C45 | 122.2(2) |
| C12 | C13 | N4  | 120.1(3) | C41 | C42 | C5  | 119.4(2) |
| C12 | C13 | C53 | 120.0(3) | C41 | C42 | C45 | 118.3(2) |
| C53 | C13 | N4  | 119.9(2) | C44 | C43 | C25 | 120.5(3) |
| C15 | C14 | N4  | 123.0(3) | C2  | C44 | C43 | 118.1(3) |
| C15 | C14 | C18 | 117.5(3) | C46 | C45 | C42 | 119.5(2) |
| C18 | C14 | N4  | 119.6(3) | C51 | C45 | C42 | 120.9(2) |
| C14 | C15 | C16 | 120.8(3) | C51 | C45 | C46 | 119.7(2) |
| C15 | C16 | C17 | 120.2(3) | C47 | C46 | C45 | 120.2(3) |
| C58 | C17 | C16 | 119.6(3) | C46 | C47 | C48 | 119.5(3) |
| C14 | C18 | O1  | 121.4(2) | C47 | C48 | C49 | 120.0(3) |
| C58 | C18 | O1  | 115.9(3) | C47 | C48 | C50 | 120.5(3) |
| C58 | C18 | C14 | 122.7(3) | C50 | C48 | C49 | 119.4(3) |
| O1  | C19 | C20 | 121.1(3) | N5  | C49 | C48 | 179.6(4) |
| C57 | C19 | O1  | 116.5(3) | C51 | C50 | C48 | 119.0(3) |
| C57 | C19 | C20 | 122.3(3) | C45 | C51 | C50 | 121.1(3) |

---



|     |     |     |          |     |     |     |          |
|-----|-----|-----|----------|-----|-----|-----|----------|
| N4  | C20 | C19 | 120.0(2) | C53 | C52 | C10 | 120.7(3) |
| C54 | C20 | N4  | 122.6(3) | C52 | C53 | C13 | 120.2(3) |
| C54 | C20 | C19 | 117.4(3) | C55 | C54 | C20 | 120.9(3) |
| C22 | C21 | C8  | 120.4(2) | C54 | C55 | C56 | 120.5(3) |
| C39 | C21 | C8  | 121.2(2) | C55 | C56 | C57 | 119.6(4) |
| C39 | C21 | C22 | 118.5(2) | C19 | C57 | C56 | 119.3(3) |
| C23 | C22 | C21 | 120.4(3) | C18 | C58 | C17 | 119.2(3) |

#### 4. Thermal and Electrochemical Properties

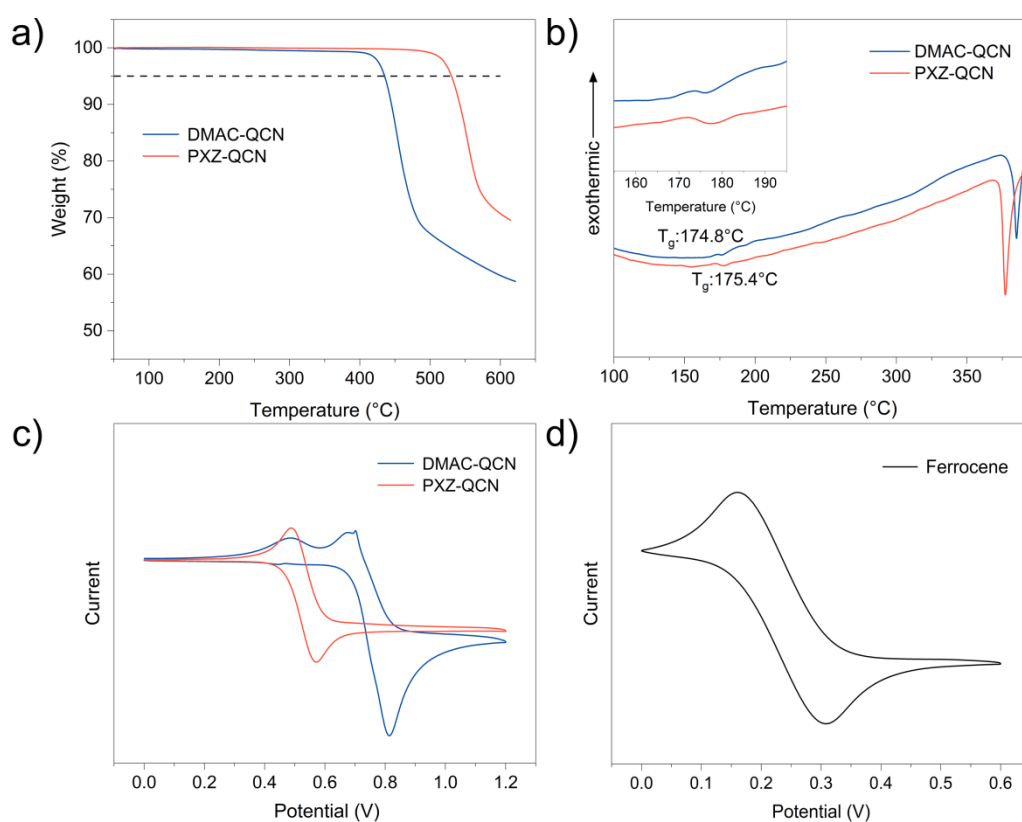

**Figure S8.** a) Thermal gravimetric analysis (TGA) traces of DMAC-QCN and PXZ-QCN. b) Differential scanning calorimetry (DSC) curves of DMAC-QCN and PXZ-QCN. Inset: magnified image of the selected region. c) Cyclic Voltammograms for the oxidation of DMAC-QCN and PXZ-QCN. d) Oxidation behaviours of Ferrocene

The CV measurements were carried out in anhydrous and nitrogen-saturated dichloromethane (DCM) solutions with 0.1 M  $n\text{-Bu}_4\text{NPF}_6$  and 1.0 mM investigated compounds. Using glassy carbon electrode as working electrode, platinum wire as auxiliary electrode, porous glass wick  $\text{Ag}/\text{AgNO}_3$  as reference electrode and

ferrocene/ferrocenium as the internal standard. The HOMO energy level was calculated from the onset potential of oxidation by cyclic voltammetry.

$$[\text{HOMO} = - (4.8 - E_{1/2(\text{Fc}/\text{Fc}^+)} + E_{\text{onset}})]$$

The LUMO energy level was determined from the difference between the HOMO levels and optical band gap ( $E_g$ ) estimated from the onset of the UV-Vis absorption band.

$$E_g = 1241 / \lambda_{\text{onset}} \quad [\text{LUMO} = \text{HOMO} + E_g]$$

**Table S6.** Summary of thermal and electrochemical properties of DMAC-QCN and PXZ-QCN.

| Compound | $T_d^{\text{a}}$<br>(°C) | $T_g^{\text{b}}$<br>(°C) | HOMO <sup>c)</sup><br>(eV) | LUMO <sup>d)</sup><br>(eV) | $E_g^{\text{e)}$<br>(eV) |
|----------|--------------------------|--------------------------|----------------------------|----------------------------|--------------------------|
| DMAC-QCN | 435.0                    | 174.8                    | -5.24                      | -2.62                      | 2.62                     |
| PXZ-QCN  | 530.0                    | 175.4                    | -5.02                      | -2.58                      | 2.44                     |

<sup>a)</sup> Decomposition temperature corresponding to 5% weight loss. <sup>b)</sup> Glass transition temperature. <sup>c)</sup> Obtained from the CV curves. <sup>d)</sup> Calculated from the  $E_g$  and HOMO levels. <sup>e)</sup> Optical energy gaps ( $E_g$ ) were determined from the UV-Vis absorption spectra.

## 5. Photophysical Properties

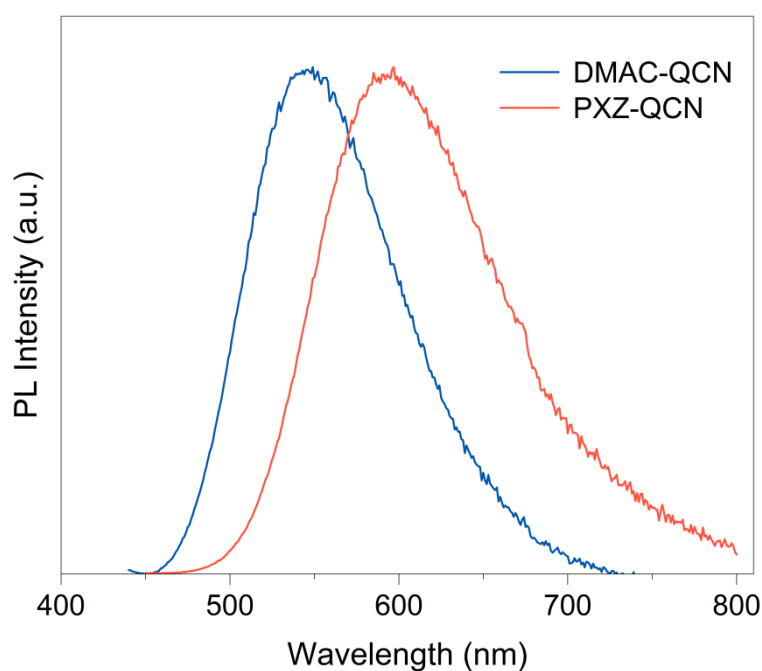

**Figure S9.** Normalized PL spectra of DMAC-QCN and PXZ-QCN in 20 wt% doped CBP film at 298K.

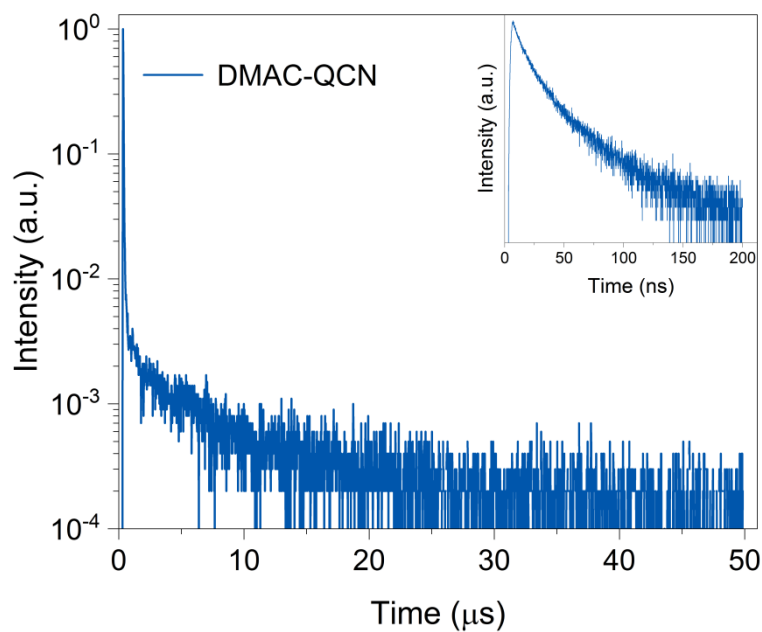

**Figure S10.** Transient PL decay curve of DMAC-QCN in 20 wt% doped CBP film at 298K.

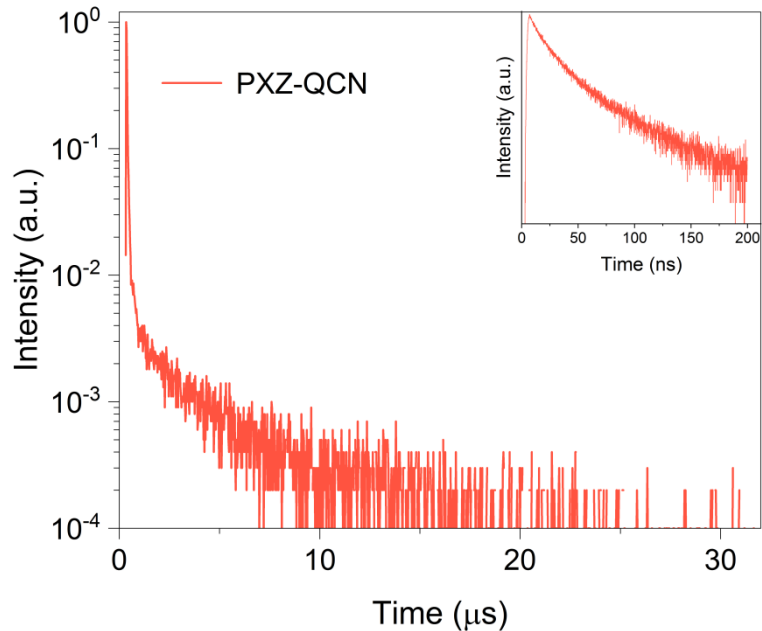

**Figure S11.** Transient PL decay curve of PXZ-QCN in 20 wt% doped CBP film at 298K.

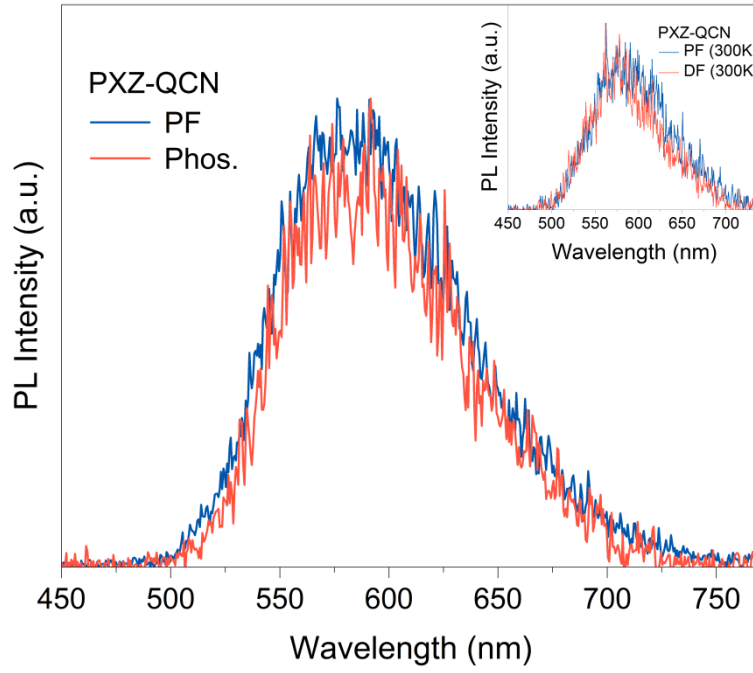

**Figure S12.** Time-resolved transient PL spectra of PXZ-QCN in 20 wt% doped CBP film at 77 K and 300 K (the inset).

#### Estimation for the Photophysical parameters

The quantum efficiencies and rate constants of the investigated compounds in 20 wt% CBP films are determined using the following equations S1-S6<sup>2</sup>.

$$K_{PF} = \frac{1}{\tau_{PF}} \quad \text{S1}$$

$$K_{DF} = \frac{1}{\tau_{DF}} \quad \text{S2}$$

$$K_{\tau}^s \approx \frac{K_{PF}K_{DF}}{K_{RISC} \Phi_{PL}} \quad \text{S3}$$

$$K_{nr}^s \approx \frac{K_{PF}K_{DF}}{K_{RISC} (1-\Phi_{PL})} \quad \text{S4}$$

$$K_{ISC} = \frac{K_{PF}K_{DF}\Phi_{DF}}{K_{RISC}\Phi_{PF}} \quad \text{S5}$$

S5

$$K_{RISC} = \frac{K_{PF} + K_{DF}}{2} - \sqrt{\left(\frac{K_{PF} + K_{DF}}{2}\right)^2 - K_{PF}K_{DF}\left(1 + \frac{\Phi_{DF}}{\Phi_{PF}}\right)} \quad \text{S6}$$

S6

## 6. Theoretical Calculations

**Table S7.** Calculated spin-orbit coupling (SOC) constants of DMAC-QCN and PXZ-QCN.

| Energy Level   |                | $\langle S_n   \hat{H}_{\text{SOC}}   T_n \rangle$ (cm <sup>-1</sup> ) |         |
|----------------|----------------|------------------------------------------------------------------------|---------|
| S <sub>n</sub> | T <sub>n</sub> | DMAC-QCN                                                               | PXZ-QCN |
| 0              | 1              | 2.4607                                                                 | 1.6667  |
| 1              | 1              | 0.0849                                                                 | 0.0894  |
| 1              | 2              | 0.0574                                                                 | 0.1179  |
| 1              | 3              | 0.2689                                                                 | 0.7116  |
| 1              | 4              | 0.6930                                                                 | 0.5751  |
| 1              | 5              | 0.8793                                                                 | 0.0300  |

## 7. Electroluminescent properties

**Table S8.** Efficiency roll-off of the representative red TADF-based OLEDs with emission peak from 600 to 630 nm at a luminance of 1000 cd/m<sup>2</sup>.

| Emitter  | Molecular structure                                                                 | $\lambda_{\text{EL}}$ | EQE <sub>max</sub> | Roll-Off | Ref.      |
|----------|-------------------------------------------------------------------------------------|-----------------------|--------------------|----------|-----------|
| PXZ-QCN  | 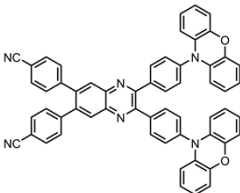 | 604                   | 15.6               | 14.1     | This work |
| PXZ-DCPP |  | 608                   | 17.4               | 25.8     | 3         |
| FDQPXZ   |  | 600                   | 9.0                | 6.1      | 4         |
| NZ2AC    |  | 612                   | 6.2                | 35.4     | 5         |

|             |  |     |      |      |    |
|-------------|--|-----|------|------|----|
| 6AcBIQ      |  | 600 | 9.5  | 64.2 | 6  |
| DPXZ-BPPZ   |  | 612 | 20.1 | 16.9 | 7  |
| HAP-3TPA    |  | 610 | 17.5 | 68.5 | 8  |
| AQ-TPA      |  | 624 | 12.5 | 81.6 | 9  |
| DPA-DCPP    |  | 616 | 10.4 | 92.3 | 10 |
| Bis-PXZ-PCN |  | 600 | 9.8  | 15.3 | 11 |
| Tri-PXZ-PCN |  | 608 | 9.7  | 17.5 | 11 |
| MeODP-DBPHZ |  | 600 | 10.3 | 38.8 | 12 |

|            |                                                                                     |     |       |      |    |
|------------|-------------------------------------------------------------------------------------|-----|-------|------|----|
| W1         | 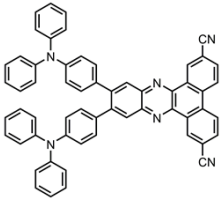   | 608 | 24.97 | 84.4 | 13 |
| 2PXZ-BP    |    | 606 | 19.2  | 52.6 | 14 |
| TPA-PZCN   |    | 628 | 27.4  | 83.2 | 15 |
| DPXZ-DPPM  |    | 630 | 11.5  | 40.8 | 16 |
| TAT-DBPZ   |   | 604 | 15.4  | 46.7 | 17 |
| TAT-FDBPZ  |  | 611 | 9.2   | 19.5 | 17 |
| PQ2        |  | 602 | 17.3  | 15.0 | 18 |
| ANQDC-MSTA |  | 622 | 21.8  | 43.1 | 19 |

|                    |                                                                                    |     |      |      |    |
|--------------------|------------------------------------------------------------------------------------|-----|------|------|----|
| ANQDC-PSTA         | 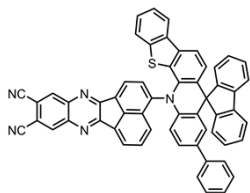  | 622 | 24.7 | 41.7 | 19 |
| DPACNZP            |   | 624 | 4.6  | 23.9 | 20 |
| DTPAB              |   | 605 | 8.2  | 9.0  | 21 |
| $\alpha$ -DMAC-DBP |   | 612 | 8.5  | 61.1 | 22 |
| BDCN-PXZ           |  | 606 | 3.71 | 5.6  | 23 |

a) Estimated from the graphs in the references.

## 8. Reference

1. S.-C. Ji, T. Zhao, Z. Wei, L. Meng, X.-D. Tao, M. Yang, X.-L. Chen, C.-Z. Lu, *Chem. Eng. J.* 2022, **435**,134868.
2. Y. Wada, H. Nakagawa, S. Matsumoto, Y. Wakisaka, H. Kaji, *Nat. Photonics*, 2020, **14**, 643.
3. B. Wang, X. Qiao, Z. Yang, Y. Wang, S. Liu, D. Ma, Q. Wang, *Org. Electron.* 2018, **59**, 32-38.
4. L. Yu, Z. Wu, G. Xie, C. Zhong, Z. Zhu, H. Cong, D. Ma, C. Yang, *Chem Commun.* 2016, **52**, 11012-5.
5. T. Liu, L. Zhu, S. Gong, C. Zhong, G. Xie, E. Mao, J. Fang, D. Ma, C. Yang, *Adv. Opt. Mater.* 2017, **5**, 1700145.
6. J.H. Yun, J.Y. Lee, *Dyes. Pigm.* 2017, **144**, 212-217.
7. J.X. Chen, K. Wang, C.J. Zheng, M. Zhang, Y.Z. Shi, S.L. Tao, H. Lin, W. Liu, W.W. Tao, X.M. Ou, X.H. Zhang, *Adv. Sci.* 2018, **5**, 1800436.
8. J. Li, T. Nakagawa, J. MacDonald, Q. Zhang, H. Nomura, H. Miyazaki, C. Adachi, *Adv. Mater.* 2013, **25**, 3319-23.
9. Q. Zhang, H. Kuwabara, W.J. Potscavage, S. Huang, Y. Hatae, T. Shibata, C. Adachi, *J. Am. Chem. Soc.* 2014, **136**, 18070-81.
10. S. Wang, Z. Cheng, X. Song, X. Yan, K. Ye, Y. Liu, G. Yang, Y. Wang, *ACS*



- Appl. Mater. Interfaces.* 2017, **9**, 9892-9901.
11. Z. Chen, Z. Wu, F. Ni, C. Zhong, W. Zeng, D. Wei, K. An, D. Ma, C. Yang, *J. Mater. Chem. C.* 2018, **6**, 6543-6548.
  12. P. Data, P. Pander, M. Okazaki, Y. Takeda, S. Minakata, A.P. Monkman, *Angew. Chem. Int. Ed.* 2016, **55**, 5739-44.
  13. Y.-Y. Wang, Y.-L. Zhang, K. Tong, L. Ding, J. Fan, L.-S. Liao, *J. Mater. Chem. C.* 2019, **7**, 15301-15307.
  14. F.M. Xie, P. Wu, S.J. Zou, Y.Q. Li, T. Cheng, M. Xie, J.X. Tang, X. Zhao, *Adv. Electron. Mater.* 2019, **6**, 1900843.
  15. Y.L. Zhang, Q. Ran, Q. Wang, Y. Liu, C. Hanisch, S. Reineke, J. Fan, L.S. Liao, *Adv. Mater.* 2019, **31**, e1902368.
  16. J. Liang, C. Li, Y. Cui, Z. Li, J. Wang, Y. Wang, *J. Mater. Chem. C.* 2020, **8**, 1614-1622.
  17. Y. Liu, Y. Chen, H. Li, S. Wang, X. Wu, H. Tong, L. Wang, *ACS Appl. Mater. Interfaces.* 2020, **12**, 30652-30658.
  18. U. Balijapalli, Y.T. Lee, B.S.B. Karunathilaka, G. Tumen-Ulzii, M. Auffray, Y. Tsuchiya, H. Nakanotani, C. Adachi, *Angew Chem. Int. Ed.* 2021, **60**, 19364-19373.
  19. T. Hua, Y.-C. Liu., C.-W. Huang, Ne. Li, C. Zhou, Z. Huang, X. Cao, C.-C. Wu, C. Yang, *Chem. Eng. J.* 2022, **433**, 133598.
  20. X. He, L. Gao, H. Liu, F. Liu, D. Jiang, C. Du, C. Sun, P. Lu, *Chem. Eng. J.* 2021, **404**, 127055.
  21. J. Jin, W. Wang, P. Xue, Q. Yang, H. Jiang, Y. Tao, C. Zheng, G. Xie, W. Huang, R. Chen, *J. Mater. Chem. C.* 2021, **9**, 2291-2297.
  22. J.H. Maeng, R. Braveenth, Y.H. Jung, S.J. Hwang, H. Lee, H.L. Min, J.Y. Kim, C.W. Han, J.H. Kwon, *Dyes. Pigm.* 2021, **194**, 109580.
  23. Z. Qiu, W. Xie, Z. Yang, J.-H. Tan, Z. Yuan, L. Xing, S.Ji, W.-C. Chen, Y. Huo, S.-j. Su, *Chem. Eng. J.* 2021, **415**, 128949.
